# Supplementary material for: In air a spin crossover active iron(ii) complex of amine/NCBH3− ligands is converted to a low spin complex of imine/CN− ligands
Source: Royal Society of Chemistry journal article supplement (doi:10.1039/c5dt03464g), 2015-01-01
Supplement: c5dt03464g1.pdf [file c5dt03464g1.pdf]

## Supporting Information

### **In air a spin crossover active iron(II) complex of amine/ $\text{NCBH}_3^-$ ligands is converted to a low spin complex of imine/ $\text{CN}^-$ ligands**

Jian Zhou,<sup>†</sup> Bo-Wen Zhu,<sup>†</sup> Jie Luan,<sup>†</sup> Zhan Liu,<sup>†</sup> Jing-kun Fang,<sup>†</sup> Xin Bao,<sup>\*†‡</sup> Guo Peng,<sup>§</sup> Jiri Tucek,<sup>||</sup> Song-Song Bao<sup>‡</sup> Li-Min Zheng<sup>‡</sup>

<sup>†</sup> School of Chemical Engineering, Nanjing University of Science and Technology, 210094 Nanjing, P. R. China. E-mail: [baox199@126.com](mailto:baox199@126.com).

<sup>‡</sup> State Key Laboratory of Coordination Chemistry, Coordination Chemistry Institute, School of Chemistry and Chemical Engineering, Nanjing University, Nanjing 210093, P. R. China

<sup>§</sup> Herbert Gleiter Institute of Nanoscience, Nanjing University of Science and Technology, 210094 Nanjing, P. R. China

<sup>||</sup>Regional Centre of Advanced Technologies and Materials, Department of Experimental Physics, Faculty of Science, Palacky University, Slechtitelu 11, 783 71 Olomouc, Czech Republic

**Synthesis of  $[\text{NiL}_1(\text{NCBH}_3)_2]$ .** To a solution of  $\text{L}_1$  ( $\text{L}_1 = \text{N,N}'\text{-bis(2-pyridylmethyl)-1,2-ethanediamine}$ , 0.024g, 0.1mmol) in a mixed solution of MeOH (10 mL) and MeCN (5 mL) was added  $\text{NiCl}_2 \cdot 6\text{H}_2\text{O}$  (0.024 g, 0.1 mmol) and  $\text{NaNCBH}_3$  (0.013g, 0.2mmol) in the air. The resulting reaction mixture was stirred for 1 h in air and then left for evaporation. Flake lavender crystals of  $\text{NiL}_1(\text{NCBH}_3)_2$  were obtained after one week in 75% yield (0.029 g). Elemental analysis, Calcd: C, 50.48; H, 6.35; N, 22.07. Found: C, 50.71; H, 6.43; N, 21.78.

20150602 zj01 #637 RT: 8.36 AV: 1 NL: 4.87E7  
T: + c Q1MS [ 100.00-500.00]

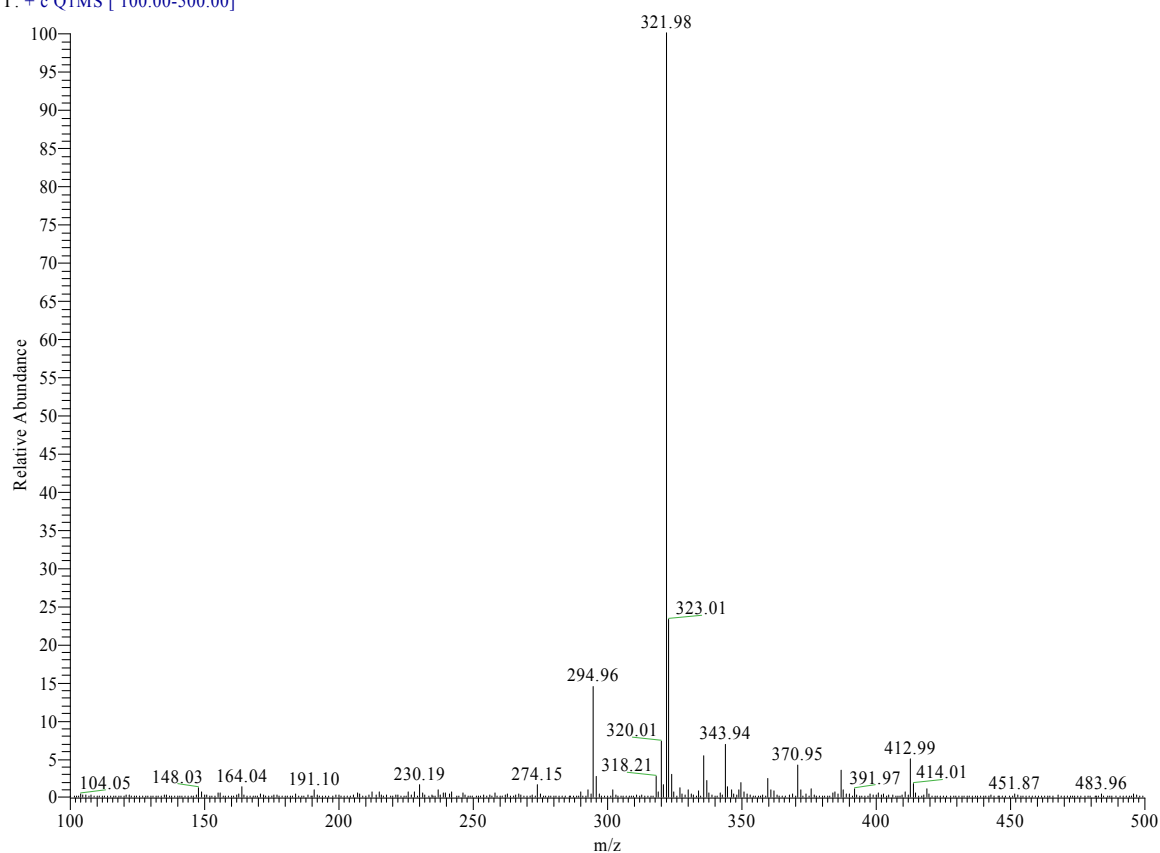

Figure S1. ESI-MS spectrum for complex **2**. The intense peak at  $m/z$  321.98 corresponds to  $[\text{FeL}_2(\text{CN})]^+$  (calc.: 322.09).

20150924\_zj01\_#42\_RT: 0.54\_AV: 1\_NL: 1.59E7  
T: + c Q1MS [ 250.00-500.00]

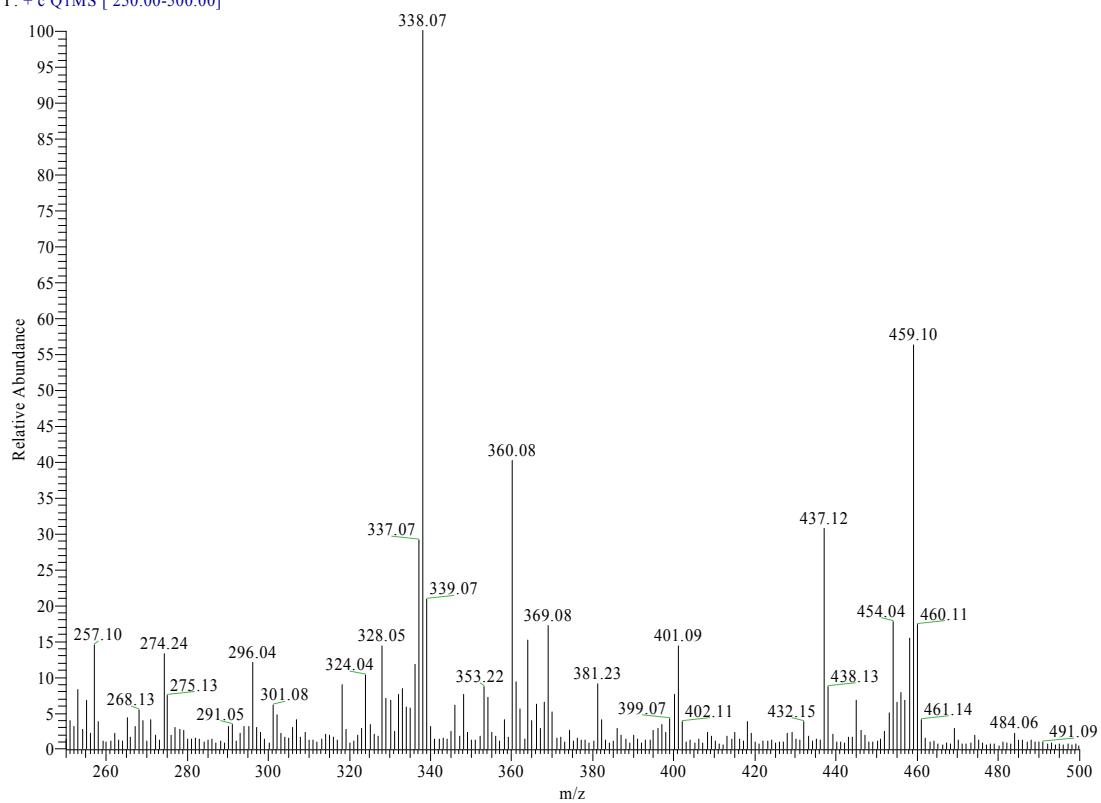

Figure S2. ESI-MS spectrum taken immediately after mixing the reactants. The strongest peak at  $m/z$  338.07 corresponds to  $[\text{FeL}_1(\text{NCBH}_3)]^+$  (calc.: 338.12) and a very weak peak at 324.04 corresponding to  $[\text{FeL}_1(\text{CN})]^+$  (calc.: 324.09).

20150924 zj01-2 #88 RT: 1.13 AV: 1 NL: 1.50E7  
T: + c Q1MS [ 250.00-600.00]

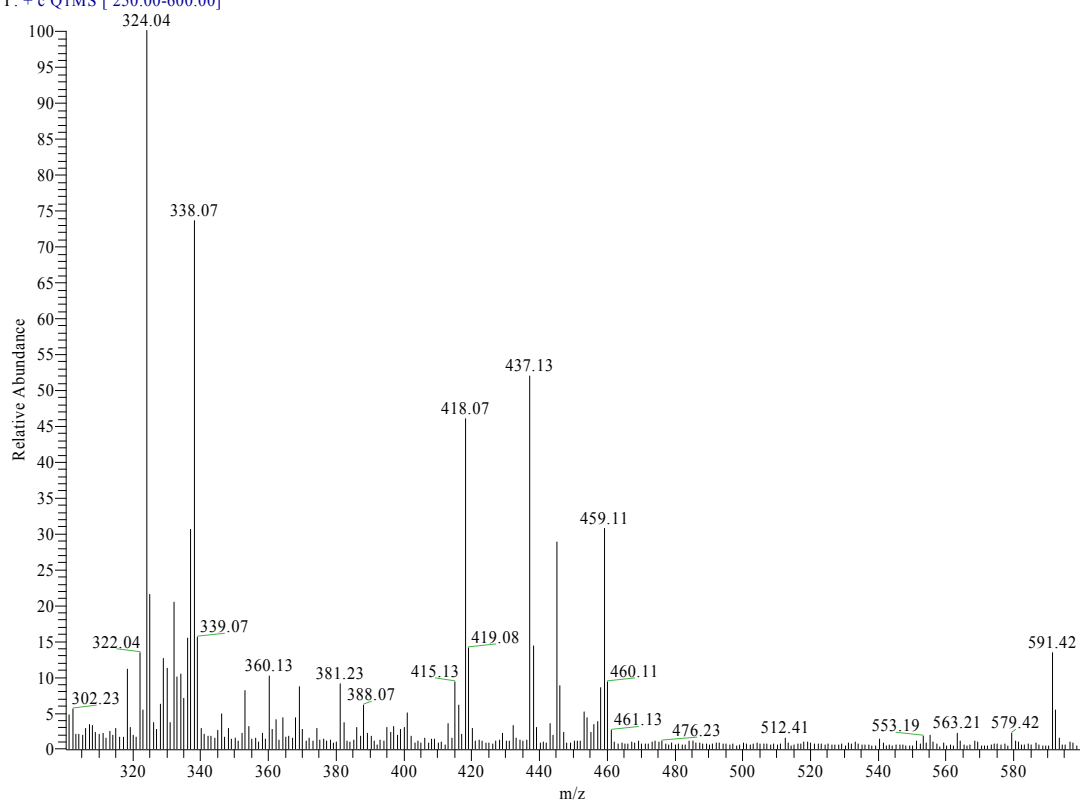

Figure S3. ESI-MS spectrum taken 5 minutes later after mixing the reactants. The peak of  $[\text{FeL}_1(\text{CN})]^+$  at 324.04 (calc.: 324.09) became the strongest and a weak peak at 322.04 corresponding to  $[\text{FeL}_2(\text{CN})]^+$  (calc.: 322.09) was observed.

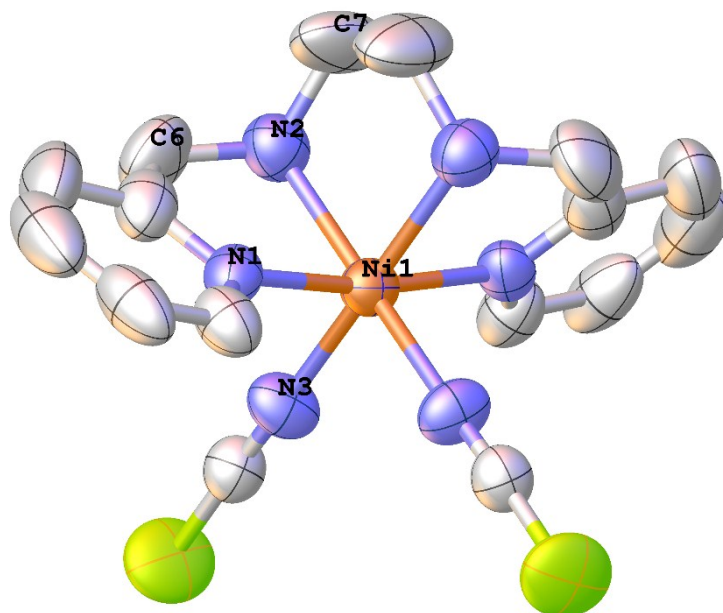

Figure S4. View of the molecular structures of  $[\text{NiL}_1(\text{NCBH}_3)_2]$ . Color code: C, gray; Ni, orange; B, green; N, blue. H atoms are omitted for clarity.

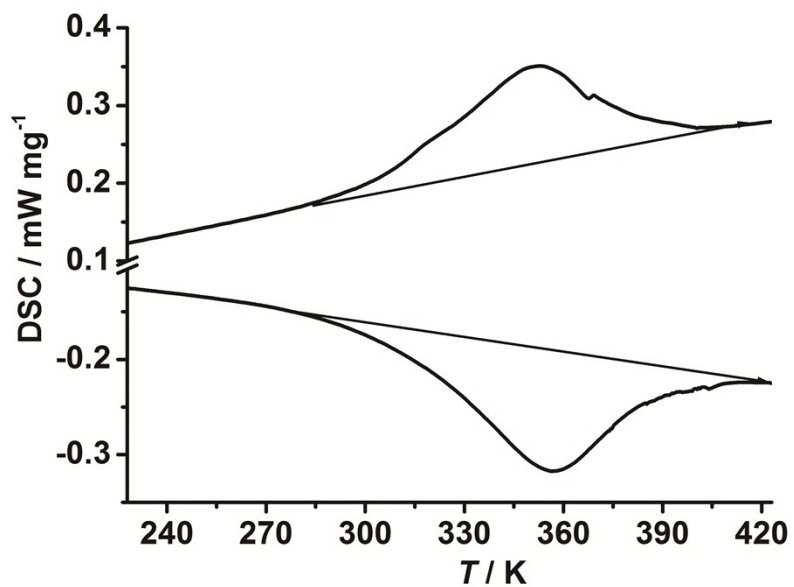

Figure S5. DSC curve of **1** showing the baseline to obtain  $\Delta H$ .

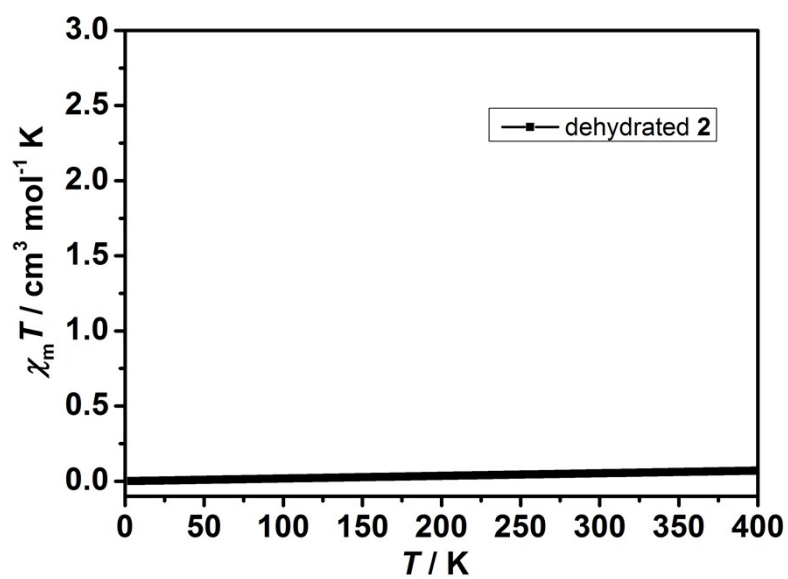

Figure S6. Variable-temperature magnetic susceptibility studies of dehydrated **2**. Data recorded in both cooling and heating modes at a scan rate of  $2 \text{ K min}^{-1}$ .

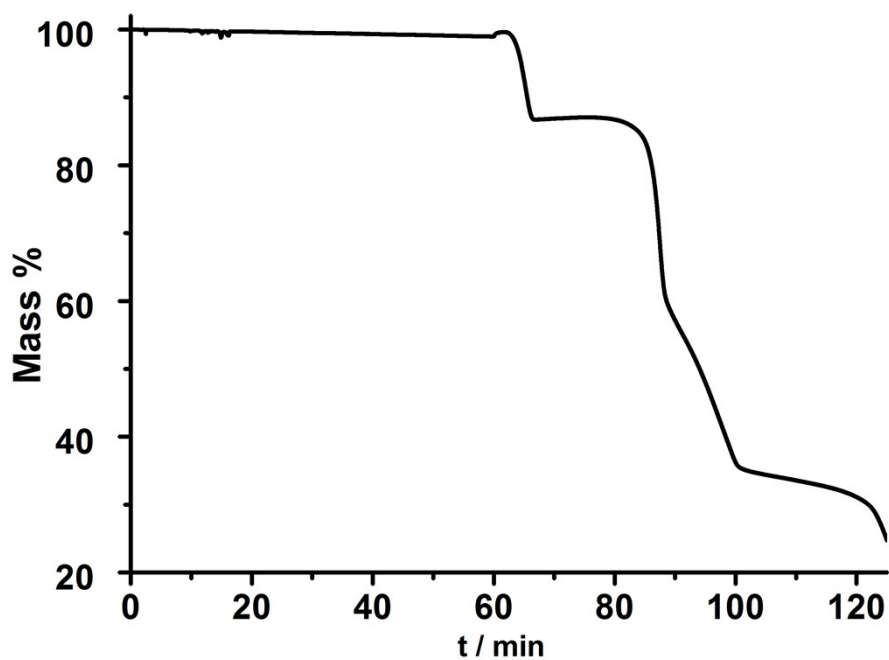

Figure S7. Time dependent TG curve for **2**. In the first 60 minutes the sample was kept at 30 °C and no weight loss was observed at this temperature.

**Table S1.**  $^{57}\text{Fe}$  Mössbauer parameters of **1** at different temperatures.

| $T$ (K) | Component | $\delta \pm 0.01$ (mm/s) | $\Delta E_Q \pm 0.01$ (mm/s) | RA $\pm 1$ (%) | Assignment          |
|---------|-----------|--------------------------|------------------------------|----------------|---------------------|
| 80      | Singlet   | 0.46                     | -----                        | 100            | LS Fe <sup>II</sup> |
| 500     | Singlet   | 0.42                     | -----                        | 5              | LS Fe <sup>II</sup> |
|         | Doublet   | 1.35                     | 1.92                         | 95             | HS Fe <sup>II</sup> |

Table S2. Unit cell and selected refinement parameters for  $\text{NiL}_1(\text{NCBH}_3)_2$ .

| $\text{NiL}_1(\text{NCBH}_3)_2$      |                                                                |
|--------------------------------------|----------------------------------------------------------------|
| Temperature / K                      | 298                                                            |
| Empirical formula                    | $\text{C}_{64}\text{H}_{96}\text{B}_8\text{N}_{24}\text{Ni}_4$ |
| Formula weight / $\text{g mol}^{-1}$ | 1522.96                                                        |
| Crystal system                       | Orthorhombic                                                   |

|                                                    |                             |
|----------------------------------------------------|-----------------------------|
| <b>Space group</b>                                 | <i>C2cb</i>                 |
| <i>a</i> / Å                                       | 9.216(3)                    |
| <i>b</i> / Å                                       | 15.403(5)                   |
| <i>c</i> / Å                                       | 14.342(5)                   |
| $\alpha$ / °                                       | 90                          |
| $\beta$ / °                                        | 90                          |
| $\gamma$ / °                                       | 90                          |
| <b>Volume</b> / Å <sup>3</sup>                     | 2035.9(11)                  |
| <b>Z</b>                                           | 1                           |
| $\rho_{\text{calc}}$ / mg mm <sup>-3</sup>         | 1.242                       |
| $\mu$ / mm <sup>-1</sup>                           | 0.964                       |
| <b>F(000)</b>                                      | 800                         |
| <b>Reflections collected</b>                       | 5662                        |
| <b>Independent reflections</b>                     | 1840                        |
|                                                    | $R_{\text{int}} = 0.0595$ , |
| <b>Goodness-of-fit on <math>F^2</math></b>         | 1.05                        |
| <b>Final <math>R</math> indexes</b>                | $R_1 = 0.0365$              |
| $[I \geq 2\sigma(I)]$                              | $wR_2 = 0.0580$             |
| <b>Final <math>R</math> indexes</b>                | $R_1 = 0.0784$              |
| [all data]                                         | $wR_2 = 0.0657$             |
| <b>Largest diff. peak/hole</b> / e Å <sup>-3</sup> | 0.26/-0.28                  |
| <b>Flack parameter</b>                             | 0.03(2)                     |

Table S3. Selected bond lengths and angles for NiL<sub>1</sub>(NCBH<sub>3</sub>)<sub>2</sub>.

| NiL <sub>1</sub> (NCBH <sub>3</sub> ) <sub>2</sub> |                    |
|----------------------------------------------------|--------------------|
| <b>Temperature / K</b>                             | 298                |
| <b>Ni–N<sub>NCBH3</sub> / Å</b>                    | 2.037(6)           |
| <b>Ni–N<sub>py</sub> / Å</b>                       | 2.093(4)           |
| <b>Ni–N<sub>amine</sub> / Å</b>                    | 2.112(6)           |
| <b>Ni–N<sub>average</sub> / Å</b>                  | 2.08               |
| <b>N2–C6 / Å</b>                                   | 1.463(11)          |
| <b><i>cis</i> N–Ni–N / °</b>                       | 80.0(2)-93.7(2)    |
| <b><i>trans</i> N–Ni–N / °</b>                     | 170.6(3) -171.9(3) |
| <b><math>\Sigma</math> Ni / °</b>                  | 52.9               |

**N-C-B / °**

179.0(7)

---

---
